# Supplementary material
Source: Research Square preprint supplement (doi:10.21203/rs.3.rs-9111597/v1)
Supplement: Supplementary file 1 [file 21f60aac3fbcf496f90cc193.docx]

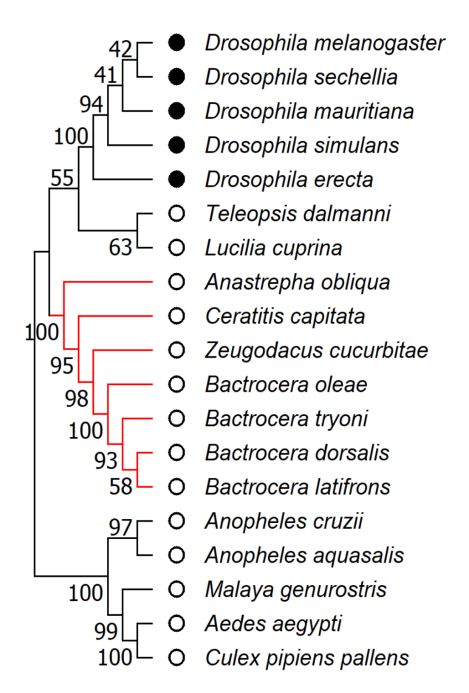


**Fig. S1. Phylogenetic distribution of sex peptide across Diptera.** Maximum likelihood tree based on sex peptide receptor sequences. The red branch represents species in the family Tephritidae. Bootstrap values (500 replicates) indicate branch support. Solid black circles: sex peptide presence; open circles: sex peptide absence.


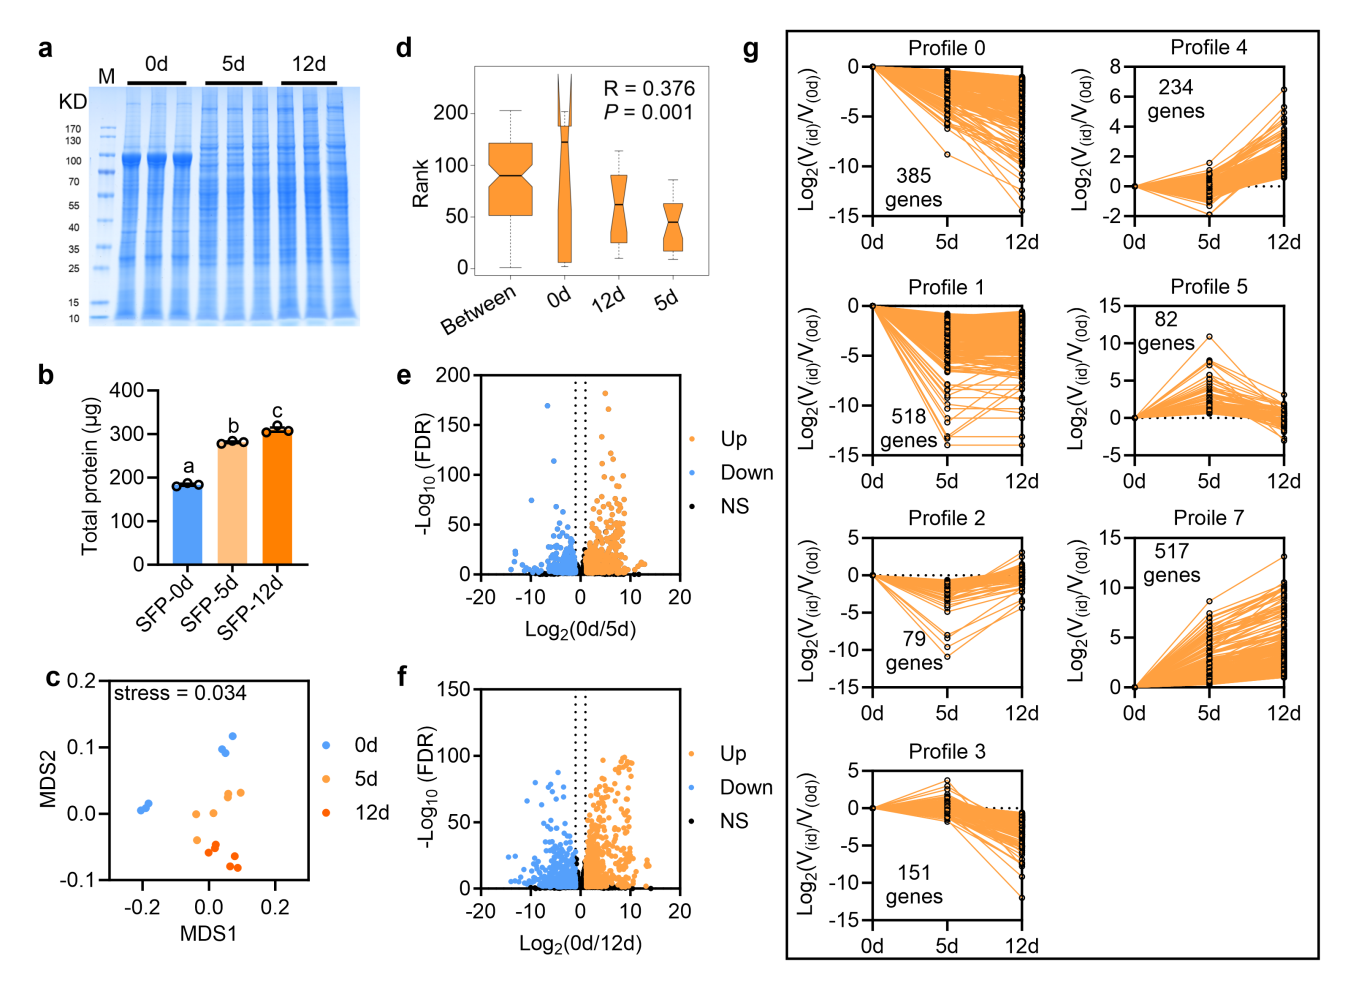


**Fig. S2. Seminal fluid proteins and male** **inner reproduction organ transcriptomic differences across different developmental stages.**

**(a)** SDS-PAGE protein profile of seminal fluid proteins (SFPs) reveals distinct banding patterns between stages.

**(b)** Quantitative analysis of seminal fluid proteins (SFPs) content (n = 3 replicates, *F*(2, 6) = 396, *P* < 0.001, ANOVA). Different lowercase letters above bars indicate significant differences (*P* < 0.05, one-way ANOVA). The hollow circles represent individual replicate data points.

**(c)** NMDS plot based on Bray-Curtis distances, showing clear segregation of transcriptomes by age.

**(d)** PERMANOVA analysis confirming significant differences in transcriptome composition between groups.

**(e and f)** Count of differentially expressed genes for each comparison against the 0-day-old baseline.

**(g)** Expression profiles of the genes in inner reproduction organ across different developmental stages.


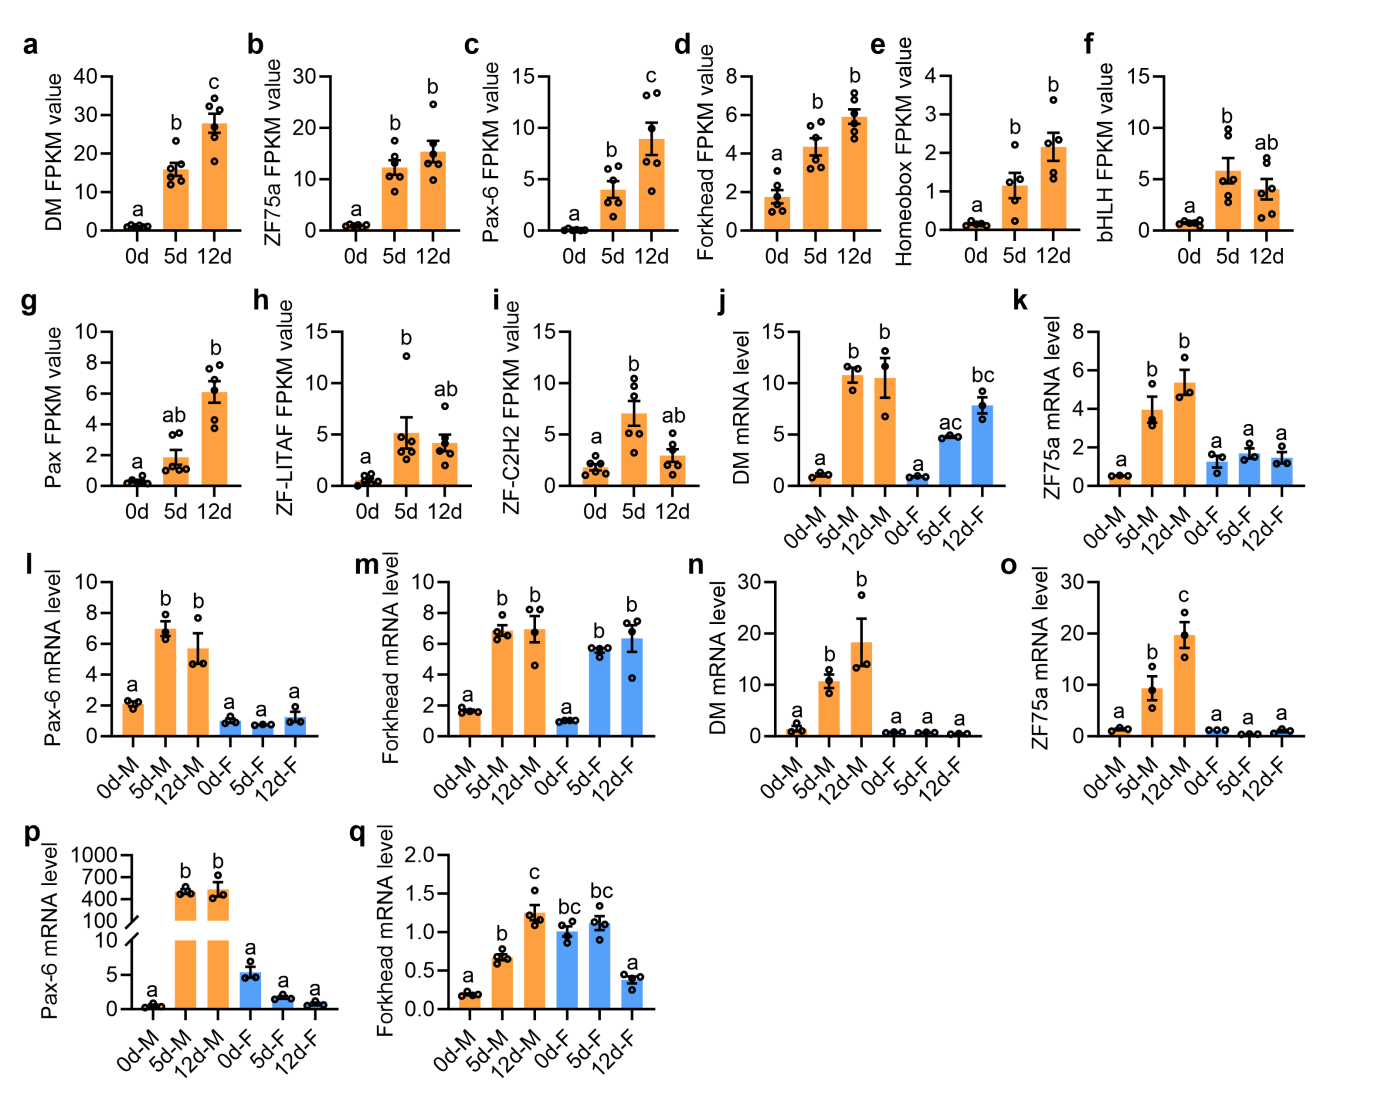


**Fig. S3. RNA-seq and qPCR validation of transcription factor expression.**

**(a-i)** FPKM value of each transcription factor in male inner reproduction organ across different development stages. One-way ANOVA results: **(a)** *F*(2,15) = 59.65, *P* < 0.001; **(b)** *F*(2,15) = 27.26, *P* < 0.001; **(c)** *F*(2,15) = 18.61, *P* < 0.001; **(d)** *F*(2,15) = 28.77, *P* < 0.001; **(e)** *F*(2,15) = 12.43, *P* = 0.001; **(f)** *F*(2,15) = 7.963, *P* = 0.004; **(g)** *F*(2,15) = 26.88, *P* < 0.001; **(h)** *F*(2,15) = 5.862, *P* = 0.013; **(i)** *F*(2,15) = 11.81, *P* = 0.001.

**(j-m)** mRNA level of each transcription factor in whole body of male and female across different development stages. One-way ANOVA results: **(j)** *F*(5,12) = 24.07, *P* < 0.001; **(k)** *F*(5,12) = 18.45, *P* < 0.001; **(l)** *F*(5,12) = 31.54, *P* < 0.001; **(m)** *F*(5,18) = 26.49, *P* < 0.001.

**(n-q)** mRNA level of each transcription factor in inner reproduction organ of male and female across different development stages. One-way ANOVA results: **(n)** *F*(5,12) = 14.32, *P* < 0.001; **(o)** *F*(5,12) = 30.11, *P* < 0.001; **(p)** *F*(5,12) = 39.56, *P* < 0.001; **(q)** *F*(5,18) = 42.06, *P* < 0.001.

The number of hollow circles on the bar chart represents the number of repetitions. Different letters above the bar chart indicate a significant difference at the 0.05 level by ANOVA.


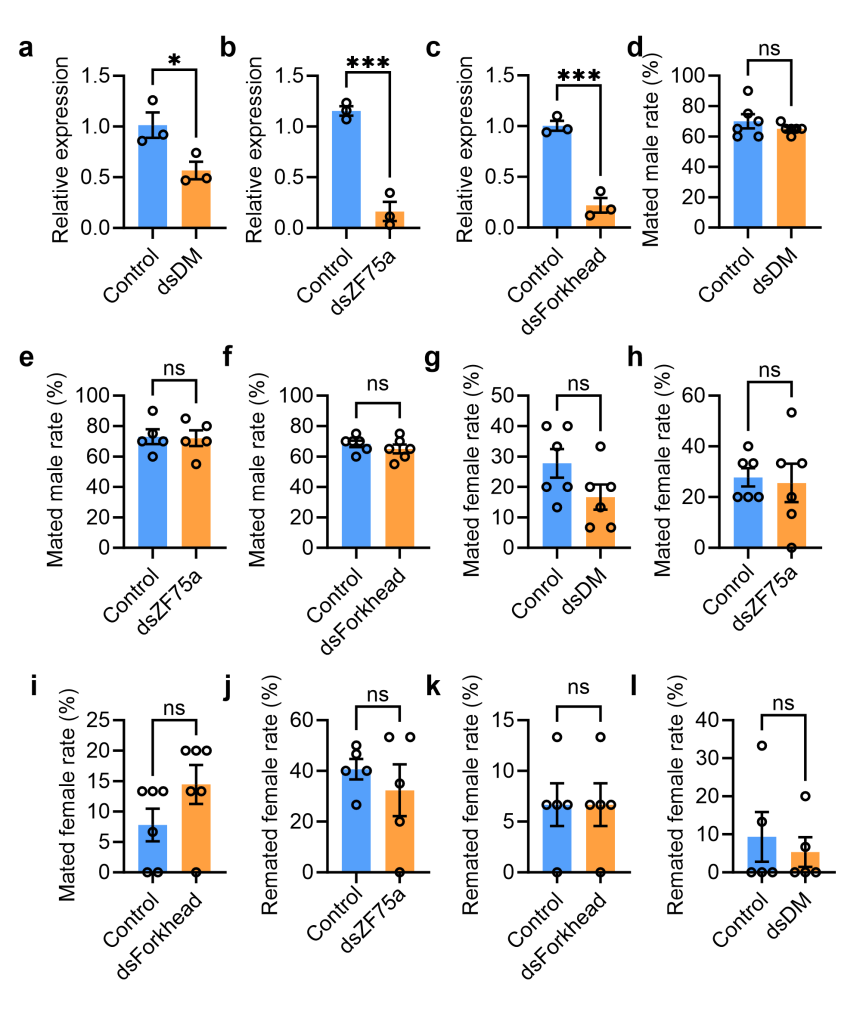


**Fig. S4. Effect of transcription factor knockdown in male on the mating of female.**

**(a-c)** mRNA levels confirm successful RNAi knockdown of DM (*t* = 2.942, *df* = 4, *P* = 0.042), ZF75a (*t* = 9.416, *df* = 4, *P* = 0.001), and Forkhead (*t* = 8.979, *df* = 4, *P* = 0.001) compared to control males (n = 3).

**(d-f)** The mating ability of DM (*t* = 1.035, *P* = 0.325), ZF75a (*t* = 0.141, *P* = 0.892), and Forkhead (*t* = 0.933, *P* =0.373) knockdown males was comparable to control males (n = 5-6).

**(g-i)** The mating rates of females injected with seminal fluid proteins (SFPs) from DM (*t* = 1.779, *df* = 10, *P* = 0.106), ZF75a (*t* = 0.537, *df* = 8, *P* = 0.606), and Forkhead (*t* = 1.604, *df* = 10, *P* = 0.14) knockdown males, compared to seminal fluid proteins (SFPs) from control males (n = 5-6).

**(j-l)** The remating rate of females that mated with DM (*t* = 0.526, *P* = 0.613), ZF75a (*t* = 0.748, *P* = 0.476), and Forkhead (*t* = 0, *P* > 0.999) knockdown males showed no significant difference from the control group.

The number of hollow circles on the bar chart represents the number of repetitions. Asterisks (**P* < 0.05, ****P* < 0.001) denote significant differences and “ns” indicates no significant difference, as determined by independent samples t-tests.


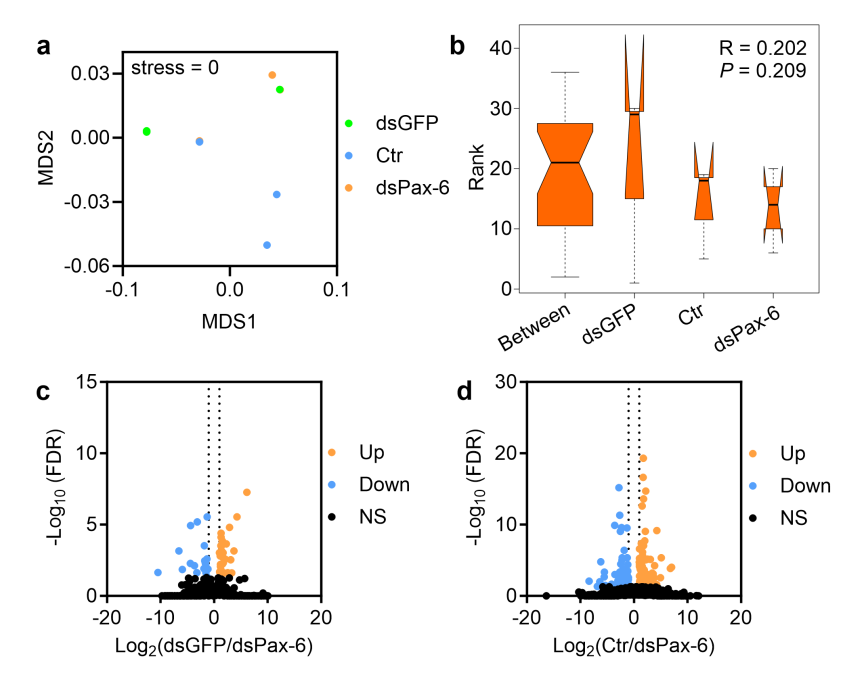


**Fig. S5. Inner reproduction organ transcriptomic differences between Pax-6 knockdown male and control.**

**(a)** NMDS plot illustrating global transcriptome profiles among Pax-6 knockdown (dsPax-6) and control (Ctr, dsGFP) groups.

**(b)** PERMANOVA analysis confirming significant differences in transcriptome composition between groups.

**(c, d)** Volcano plots depicting DEGs in the **(c)** Ctr vs. dsPax-6 and **(d)** dsGFP vs. dsPax-6 comparisons.


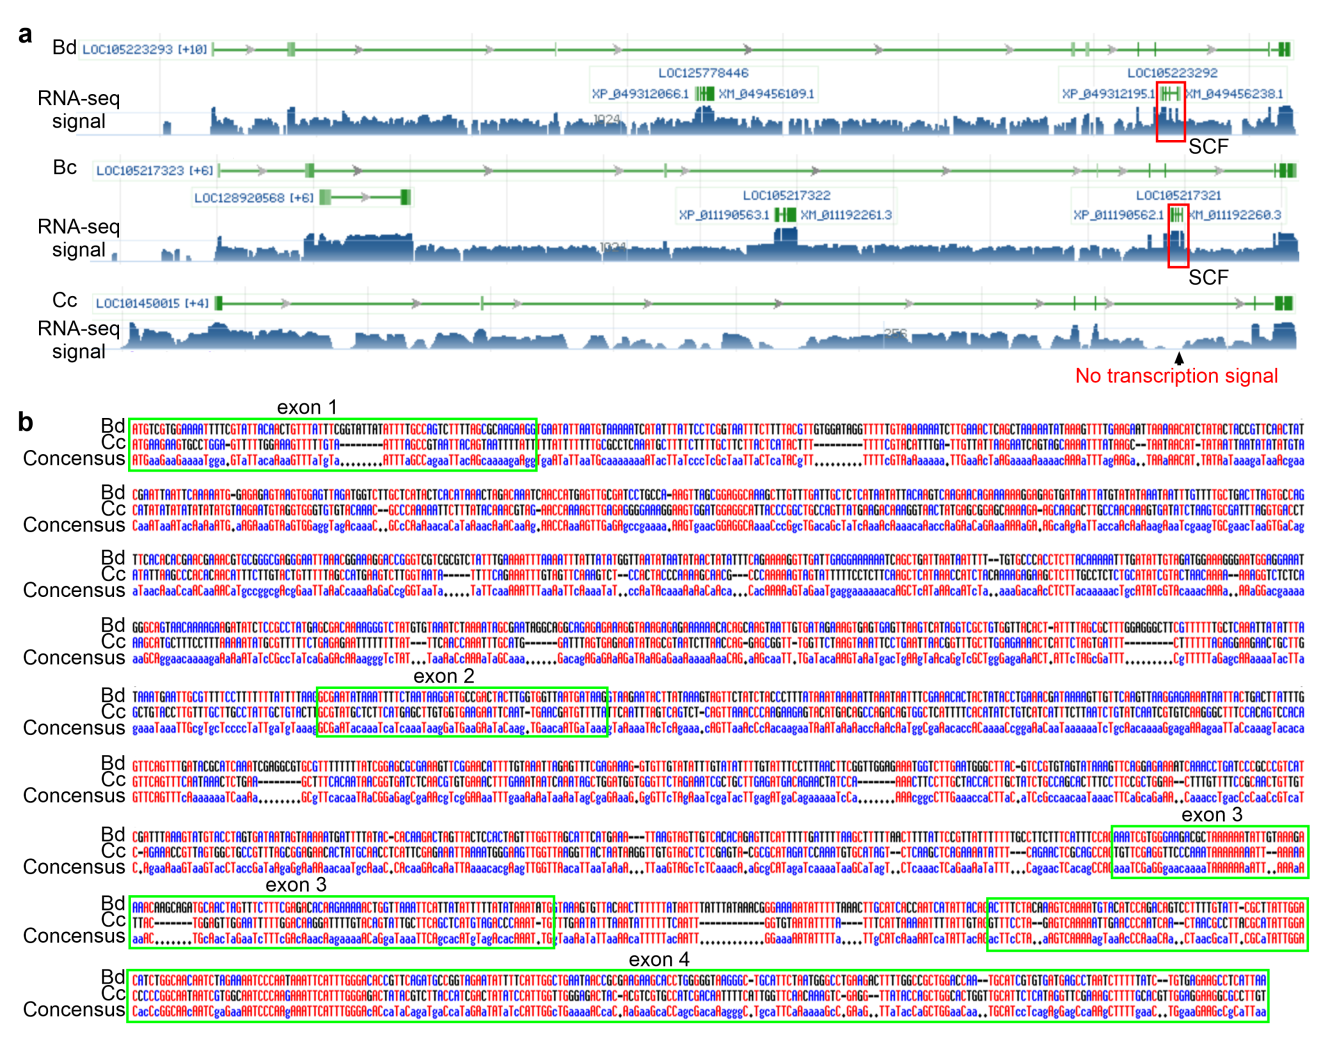


**Fig. S6. Analysis of SCF transcription and origin in Tephritidae.**

**(a)** Analysis of transcriptional signals of the SCF in *B. dorsalis* and its homologous sequence in *C. capitata*. The red boxes showed the RNA-seq signal of SCF in *B. dorsalis* and *B. cucurbitae*.

**(b)** Alignment analysis of the SCF *B. dorsalis* and its homologous sequence in *C. capitata*.


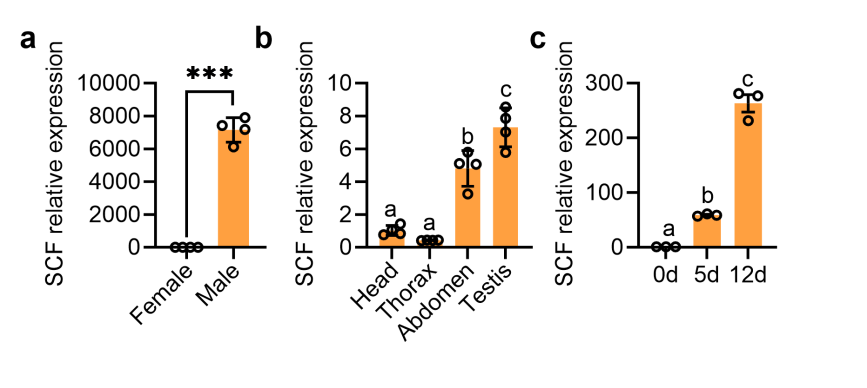


**Fig. S7. Expression of SCF in *B. cucurbitae*.**

**(a)** Expression of SCF in female and male of*B. cucurbitae* (n = 4 replicates, *t* = 19.08, *df* = 6, *P* < 0.001, independent sample t test).

**(b)** Expression of SCF in different part of mature male (12-days-old) of *B. cucurbitae* (n = 4 replicates, *F*(3, 12) = 62.67, *P* < 0.001, ANOVA).

**(c)** Expression of SCF in male of *B. cucurbitae* at different development stages (n = 3 replicates, *F*(2, 6) = 225.8, *P* < 0.001, ANOVA).

The number of hollow circles on the bar chart of the figures represents the number of repetitions. Different letters above the bar chart indicate a significant difference by ANOVA. Asterisks (****P* < 0.001) denote significant differences determined by independent samples t-tests.

**Table S1 Probes used in EMSA**

|  |  | Sequence | Score |
| --- | --- | --- | --- |
| Pax-6 vs SCF | Probe 1 | tttcgtaaactattttgattaagaagaaaa | 9.9 |
| Probe 2 | ggctgtccgtaaataaattattttaatacc | 8.9 |
| Probe 3 | gccactcttttatcgaactaccctctcgtt | 8.8 |
| Probe 4 | gcgccatccctgattgaattttatttcgtc | 7 |
| Probe 5 | gcattaaatgattaattacatttcttattc | 6.8 |

Note: The red sequence is the Predicted binding sites (PBSs).

**Table S2 Primers used in the study**

|  | Gene | Primer name | sequence(5’-3’) | Product size |
| --- | --- | --- | --- | --- |
| Primers used for gene quantification | ZF75a | ZF75a-F | TGTTGTTTGCGCGAGAATCC | 204 |
| ZF75a-R | GCGTAAACGCACCAAACAGT |
| Pax-6 | Pax-6-F | GAATGCGCTCATGTCCCAAC | 207 |
| Pax-6-R | TCGCGCTTGTACTGTTCGAT |
| DM | DM-F | CCAGCACAATCGCTAGAAGGTTC | 204 |
| DM -R | TGGCATCATCTCCCATGGATATCG |
| Forkhead | FH-F | CTACACCATTACTGGGTGCGAAT | 199 |
| FH -R | TGTAAGGCAAATTGCTTCTGATAACTG |
| Bd-SCF | Bd-SCF-F | TTGGGACACCGTTCAGATGC | 128 |
| Bd-SCF-R | CACACGATGCATTGGTCCAG |
| Bd-RPL | Bd-RPL-F | CGATTTCTCCGCAGTATTCAC | 147 |
| Bd-RPL-R | GCCAGTACCTCATGCCTAACA |
| Bd-α-TUB | Bd-α-TUB-F | CGCATTCATGGTTGATAACG | 184 |
| Bd-α-TUB-R | GGGCACCAAGTTAGTCTGGA |
| Bc-SCF | Bc-SCF-F | CCAGCCTTTTAGCGCAGCAAG | 252 |
| Bc-SCF-R | TGCCGGACGTCCAATAAGCAAA |
| Bc-RPL | Bc-RPL-F | ATGACGATCCGCCCCGCATA | 222 |
| Bc-RPL-R | CTTGAAGCCTGTTGGTAGCATA |
| Bc-α-TUB | Bc-α-TUB-F | ATGTCAAGCCGCGGTGAAAT | 220 |
| Bc-α-TUB-R | CTGTTGGTTCCGTGTCGACG |
| Primers used for RNAi | ZF75a | dsZF75a-F | GGATCCTAATACGACTCACTATAGGNTGAACACTGTTTGGTGCGTT | 492 |
| dsZF75a-R | GGATCCTAATACGACTCACTATAGGNTCCTGTGAGCTGTCCGTATG |
| Pax-6 | dsPax-6-F | GGATCCTAATACGACTCACTATAGGNCATATGTTGTCGCAACAGGG | 500 |
| dsPax-6-R | GGATCCTAATACGACTCACTATAGGNGTCAACAGACCACCCGAGTT |
| Bd-SCF | dsBd-SCF-F | GGATCCTAATACGACTCACTATAGGNAGGATGCCGACTACTTGGTG | 300 |
| dsBd-SCF-R | GGATCCTAATACGACTCACTATAGGNGTGCTTCTTCGCGGTTATTC |
| UP1 | dsUP1-F | GGATCCTAATACGACTCACTATAGGNCGACAACCCAAACAACAATG | 458 |
| dsUP1-R | GGATCCTAATACGACTCACTATAGGNATGGCACACTATCCGATTCA |
| DM | dsDM-F | GGATCCTAATACGACTCACTATAGGNGTCCGATTCGGACATGCATGACTC | 540 |
| dsDM-R | GGATCCTAATACGACTCACTATAGGNGGTGGTGGCACCGACCCAGGTACA |
| Forkhead | dsFH-F | GGATCCTAATACGACTCACTATAGGNCACCGGAAAACCCTTGTGCAGAA | 523 |
| dsFH-R | GGATCCTAATACGACTCACTATAGGNCCGGCTATTGTCTGTGTGGGTATC |
| Bc-SCF | dsBc-SCF-F | GGATCCTAATACGACTCACTATAGGNTTTCCACTAAAGATGCTGACTACATAATTGT | 413 |
| dsBc-SCF-R | GGATCCTAATACGACTCACTATAGGNTTAGTGAGGACTCTCGCAAATAAAAAGATTC |
| GFP | dsGFP-F | GGATCCTAATACGACTCACTATAGGNACTACCTGTTCCATGGCCAAC | 468 |
| dsGFP-R | GGATCCTAATACGACTCACTATAGGNGAAAGGGCAGATTGTGTGGAC |
| Primers used for luciferase assay | SCF | SCF-R | CCGCTAGCAATATATGAGAGGCACGTCGATCTCTCAAT | 2133 |
| SCF-F | CCGGTACCGCTCTACCCGATAGGTGGCAC |
| Pax-6 | Pax6-zF | CCGGTACCGGCACCATGTCCCAACAGCGTTTACTCGAG | 1929 |
| Pax6-zR | CCGGATCCACCACCGCCGCTTCCACCACCTCCGCGATCATGCTTGGTGAGTTGC |
| Primers used for EMSA | Pax-6 | Pax-6-TF | GGATCCTAATACGACTCACTATAGGNATGTCCCAACAGCGTTTACTCGAG | 1929 |
| Pax-6-TR | TCAGCGATCATGCTTGGTGAGTTG |
| Primers used for protein expression | SCF | SCF-YF | GGTGGTGGATCCGAATTCCGGACTATGC | 433 |
| SCF-YR | GTGCTCGAGTGCGGCCTTATTAATGCGGTTT |
